# Supplementary material for: Reaching the end of the line: Operational issues with implementing phone-based unannounced pill counts in resource-limited settings
Source: PubMed Central journal article supplement (PMC5648117; doi:10.1371/journal.pone.0185549), 2017-10-19
Supplement: pone.0185549.s001.pdf [file pone.0185549.s001.pdf]

**START Pill Count Form**

SID:   -MC-

"I am calling you today so we can count together the number of HIV and TB pills that are left in your medication bottles/blister packs. Are you in a private area where you can discuss your pills?" (If NO, call at different time to complete form. If YES- continue). "First, please tell me if you've taken your HIV and TB medication today" (write answer of yes or no in column below). "Next, please take a moment to bring all of your medication bottles and blister packs to the phone so we can count together how many pills you have left." (If patient cannot count, ask if there is someone else there who can help them count. If NO, do not complete parts of form requiring counting and indicate reason of 'participant cannot count.') Refer to Pill Count Facsheet for regimen and codes. If HIV regimen is dispensed in separate pills and bottles, separate them by HIV drug A, HIV drug B, and HIV drug C and use individual codes for each. If the patient is receiving HIV medications in combined dose/pills, then only enter on HIV drug A and include combined regimen code.

**HIV Medications**

|          |            | Date patient reached by phone (dd/mm/yyyy) | Date drugs dispensed (dd/mm/yyyy) | Number of pills dispensed at last visit | Number of doses per day | Pills taken per dose | Number of days since pills dispensed | Did patient take pills today? (yes/no) | Number of pills left | Code of drug |
|----------|------------|--------------------------------------------|-----------------------------------|-----------------------------------------|-------------------------|----------------------|--------------------------------------|----------------------------------------|----------------------|--------------|
| Month 1  | HIV drug A |                                            |                                   |                                         |                         |                      |                                      |                                        |                      |              |
|          | HIV drug B |                                            |                                   |                                         |                         |                      |                                      |                                        |                      |              |
|          | HIV drug C |                                            |                                   |                                         |                         |                      |                                      |                                        |                      |              |
| Month 2  | HIV drug A |                                            |                                   |                                         |                         |                      |                                      |                                        |                      |              |
|          | HIV drug B |                                            |                                   |                                         |                         |                      |                                      |                                        |                      |              |
|          | HIV drug C |                                            |                                   |                                         |                         |                      |                                      |                                        |                      |              |
| Month 3  | HIV drug A |                                            |                                   |                                         |                         |                      |                                      |                                        |                      |              |
|          | HIV drug B |                                            |                                   |                                         |                         |                      |                                      |                                        |                      |              |
|          | HIV drug C |                                            |                                   |                                         |                         |                      |                                      |                                        |                      |              |
| Month 4  | HIV drug A |                                            |                                   |                                         |                         |                      |                                      |                                        |                      |              |
|          | HIV drug B |                                            |                                   |                                         |                         |                      |                                      |                                        |                      |              |
|          | HIV drug C |                                            |                                   |                                         |                         |                      |                                      |                                        |                      |              |
| Month 5  | HIV drug A |                                            |                                   |                                         |                         |                      |                                      |                                        |                      |              |
|          | HIV drug B |                                            |                                   |                                         |                         |                      |                                      |                                        |                      |              |
|          | HIV drug C |                                            |                                   |                                         |                         |                      |                                      |                                        |                      |              |
| Month 6  | HIV drug A |                                            |                                   |                                         |                         |                      |                                      |                                        |                      |              |
|          | HIV drug B |                                            |                                   |                                         |                         |                      |                                      |                                        |                      |              |
|          | HIV drug C |                                            |                                   |                                         |                         |                      |                                      |                                        |                      |              |
| Month 7  | HIV drug A |                                            |                                   |                                         |                         |                      |                                      |                                        |                      |              |
|          | HIV drug B |                                            |                                   |                                         |                         |                      |                                      |                                        |                      |              |
|          | HIV drug C |                                            |                                   |                                         |                         |                      |                                      |                                        |                      |              |
| Month 8  | HIV drug A |                                            |                                   |                                         |                         |                      |                                      |                                        |                      |              |
|          | HIV drug B |                                            |                                   |                                         |                         |                      |                                      |                                        |                      |              |
|          | HIV drug C |                                            |                                   |                                         |                         |                      |                                      |                                        |                      |              |
| Month 9  | HIV drug A |                                            |                                   |                                         |                         |                      |                                      |                                        |                      |              |
|          | HIV drug B |                                            |                                   |                                         |                         |                      |                                      |                                        |                      |              |
|          | HIV drug C |                                            |                                   |                                         |                         |                      |                                      |                                        |                      |              |
| Month 10 | HIV drug A |                                            |                                   |                                         |                         |                      |                                      |                                        |                      |              |
|          | HIV drug B |                                            |                                   |                                         |                         |                      |                                      |                                        |                      |              |
|          | HIV drug C |                                            |                                   |                                         |                         |                      |                                      |                                        |                      |              |

| ARV 1 <sup>st</sup> line regimen (combined) | 1st line HIV (combined) regimen or drug code | ARV 2 <sup>nd</sup> line regimen (combined) | 2nd line HIV (combined) regimen or drug code |
|---------------------------------------------|----------------------------------------------|---------------------------------------------|----------------------------------------------|
| TDF - 3TC - EFV                             | 1a                                           | AZT - 3TC - LPV/r                           | 2a                                           |
| TDF - 3TC - NVP                             | 1b                                           | TDF - 3TC - LPV/r                           | 2b                                           |
| AZT - 3TC - NVP                             | 1c                                           | AZT - 3TC - ATV/r                           | 2c                                           |
| AZT - 3TC - EFV                             | 1d                                           | TDF - 3TC - ATV/r                           | 2d                                           |
| ABC - 3TC - NVP                             | 1e                                           | DDI - ABC - LPV/r                           | 2e                                           |
| ABC - 3TC - EFV                             | 1f                                           | DDI - 3TC - LPV/r                           | 2f                                           |
| Other ARV regimen*                          | 1g                                           |                                             |                                              |

\* For other ARV regimen, specify the drug next to the code above

| Individual HIV drugs (1st and 2nd line regimens) | Individual HIV drug code |
|--------------------------------------------------|--------------------------|
| TDF                                              | 3a                       |
| 3TC                                              | 3b                       |
| EFV                                              | 3c                       |
| AZT                                              | 3d                       |
| NVP                                              | 3e                       |
| ABC                                              | 3f                       |
| LPV/r                                            | 3g                       |
| ATV/r                                            | 3h                       |
| DDI                                              | 3i                       |
| Other individual code**                          | 3j                       |

\*\* For other individual HIV drug code, specify drug next to the code above

|                                                                                       |                                                                                                                                                                          |
|---------------------------------------------------------------------------------------|--------------------------------------------------------------------------------------------------------------------------------------------------------------------------|
|  | <p><b>Columbia University IRB</b><br/>                 IRB-AAK7103<br/>                 IRB Approval Date: 09/25/2014<br/>                 for use until: 09/24/2015</p> |
|---------------------------------------------------------------------------------------|--------------------------------------------------------------------------------------------------------------------------------------------------------------------------|

START Pill Count Form

SID: -MC-

| TB Medications |                                            |                                   |                                         |                         |                      |                                      |                                        |                      |              |
|----------------|--------------------------------------------|-----------------------------------|-----------------------------------------|-------------------------|----------------------|--------------------------------------|----------------------------------------|----------------------|--------------|
|                | Date patient reached by phone (dd/mm/yyyy) | Date drugs dispensed (dd/mm/yyyy) | Number of pills dispensed at last visit | Number of doses per day | Pills taken per dose | Number of days since pills dispensed | Did patient take pills today? (yes/no) | Number of pills left | Code of drug |
| Month 1        |                                            |                                   |                                         |                         |                      |                                      |                                        |                      |              |
| Month 2        |                                            |                                   |                                         |                         |                      |                                      |                                        |                      |              |
| Month 3        |                                            |                                   |                                         |                         |                      |                                      |                                        |                      |              |
| Month 4        |                                            |                                   |                                         |                         |                      |                                      |                                        |                      |              |
| Month 5        |                                            |                                   |                                         |                         |                      |                                      |                                        |                      |              |
| Month 6        |                                            |                                   |                                         |                         |                      |                                      |                                        |                      |              |
| Month 7        |                                            |                                   |                                         |                         |                      |                                      |                                        |                      |              |
| Month 8        |                                            |                                   |                                         |                         |                      |                                      |                                        |                      |              |
| Month 9        |                                            |                                   |                                         |                         |                      |                                      |                                        |                      |              |
| Month 10       |                                            |                                   |                                         |                         |                      |                                      |                                        |                      |              |

| TB drug code                | TB Regimen or drug code |
|-----------------------------|-------------------------|
| RH                          | 01                      |
| RHZES                       | 02                      |
| RHZE                        | 03                      |
| RHE                         | 04                      |
| Other TB treatment regimen* | 06                      |

\* For other TB treatment regimen, specify the drug next to the code above
