# Supplementary material for: Reaching the end of the line: Operational issues with implementing phone-based unannounced pill counts in resource-limited settings
Source: PubMed Central journal article supplement (PMC5648117; doi:10.1371/journal.pone.0185549), 2017-10-19
Supplement: pone.0185549.s002.pdf [file pone.0185549.s002.pdf]

## ENRICH Pill Count Form

Study Identification Number   .MC-

"I am calling you today so we can count together the number of HIV and IPT pills that are left in your medication bottles/plastic packs. Are you in a private area where you can discuss your pills?" (If NO- call at different time to complete form. If YES- continue). "First, please tell me if you've taken your HIV and IPT medication today." (write answer of yes or no in column below). "Next, please take a moment to bring your HIV and IPT medication bottles and plastic packs to the phone so we can count together how many pills you have left." (If patient cannot count, ask if there is someone else there who can help them count. If NO, do not complete parts of form requiring counting and indicate reason of 'participant cannot count.'). Refer to Pill Count Facesheet for dispensing date, number of pills dispensed, regimen and codes. Begin by asking about IPT pills and when completed, ask participant after HIV pills. For all dates, use Ethiopian calendar.

| IPT                |                                            |                                   |                                         |                         |                      |                                   |                                        |                      |              |
|--------------------|--------------------------------------------|-----------------------------------|-----------------------------------------|-------------------------|----------------------|-----------------------------------|----------------------------------------|----------------------|--------------|
| Month in the study | Date patient reached by phone (dd/mm/yyyy) | Date drugs dispensed (dd/mm/yyyy) | Number of pills dispensed at last visit | Number of doses per day | Pills taken per dose | Number of days since dispensation | Did patient take pills today? (yes/no) | Number of pills left | Code of drug |
| Month 1            |                                            |                                   |                                         | 1                       |                      |                                   |                                        |                      |              |
| Month 2            |                                            |                                   |                                         | 1                       |                      |                                   |                                        |                      |              |
| Month 3            |                                            |                                   |                                         | 1                       |                      |                                   |                                        |                      |              |
| Month 4            |                                            |                                   |                                         | 1                       |                      |                                   |                                        |                      |              |
| Month 5            |                                            |                                   |                                         | 1                       |                      |                                   |                                        |                      |              |
| Month 6            |                                            |                                   |                                         | 1                       |                      |                                   |                                        |                      |              |
| Month 7            |                                            |                                   |                                         | 1                       |                      |                                   |                                        |                      |              |
| Month 8            |                                            |                                   |                                         | 1                       |                      |                                   |                                        |                      |              |
| Month 9            |                                            |                                   |                                         | 1                       |                      |                                   |                                        |                      |              |
| Month 10           |                                            |                                   |                                         | 1                       |                      |                                   |                                        |                      |              |

| HIV                |                                            |                                   |                                         |                         |                      |                                   |                                        |                      |              |
|--------------------|--------------------------------------------|-----------------------------------|-----------------------------------------|-------------------------|----------------------|-----------------------------------|----------------------------------------|----------------------|--------------|
| Month in the study | Date patient reached by phone (dd/mm/yyyy) | Date drugs dispensed (dd/mm/yyyy) | Number of pills dispensed at last visit | Number of doses per day | Pills taken per dose | Number of days since dispensation | Did patient take pills today? (yes/no) | Number of pills left | Code of drug |
| Month 1            |                                            |                                   |                                         |                         |                      |                                   |                                        |                      |              |
| Month 2            |                                            |                                   |                                         |                         |                      |                                   |                                        |                      |              |
| Month 3            |                                            |                                   |                                         |                         |                      |                                   |                                        |                      |              |
| Month 4            |                                            |                                   |                                         |                         |                      |                                   |                                        |                      |              |
| Month 5            |                                            |                                   |                                         |                         |                      |                                   |                                        |                      |              |
| Month 6            |                                            |                                   |                                         |                         |                      |                                   |                                        |                      |              |
| Month 7            |                                            |                                   |                                         |                         |                      |                                   |                                        |                      |              |
| Month 8            |                                            |                                   |                                         |                         |                      |                                   |                                        |                      |              |
| Month 9            |                                            |                                   |                                         |                         |                      |                                   |                                        |                      |              |
| Month 10           |                                            |                                   |                                         |                         |                      |                                   |                                        |                      |              |

| ART 1 <sup>st</sup> line regimen | Regimen code |
|----------------------------------|--------------|
| 3H1 - 3TC - NVP                  | 1a           |
| 3H1 - 3TC - EFV                  | 1b           |
| AZT - 3TC - NVP                  | 1c           |
| AZT - 3TC - EFV                  | 1d           |
| TDF - 3TC - EFV                  | 1e           |
| TDF - 3TC - NVP                  | 1f           |
| TDF - FTC - EFV                  | 1g           |
| ABC - 3TC - NVP                  | 1h           |
| ABC - 3TC - EFV                  | 1i           |
| ABC - 3TC - AZT                  | 1j           |
| Other, specify                   | 1k           |

| ART 2 <sup>nd</sup> line regimen | Regimen code |
|----------------------------------|--------------|
| ABC - ddi - LPV/r                | 2a           |
| TDF - ddi - LPV/r                | 2b           |
| TDF - 3TC - LPV/r                | 2c           |
| AZT - 3TC - LPV/r                | 2d           |
| Other, specify                   | 2e           |

| IPT regimen    | Regimen Code |
|----------------|--------------|
| INH            | 0            |
| INH+B6         | 1            |
| Other, specify | 2            |

## ENRICH Pill Count Facesheet

**Instructions:** Update this form during every study visit with MC participant. Information captured here should be referred to when completing unannounced Pill Count Form.

|                                                |  |
|------------------------------------------------|--|
| Preferred Days of week for phone calls:        |  |
| Day(s) of week DOES NOT wish to receive calls: |  |
| Preferred times of day for phone calls:        |  |
| Time(s) of day DOES not wish to receive calls: |  |
| Preferred phone number to call:                |  |

*Instructions: To complete for IPT, refer to pill bottle/plastic pack dispensed to participant at clinic visit.*

### IPT Pills

| Date Dispersed<br>(dd/mm/yyyy) | Regimen Dispersed<br>(use codes below) | Total number of pills<br>dispensed | Time of day doses taken |
|--------------------------------|----------------------------------------|------------------------------------|-------------------------|
|                                |                                        |                                    |                         |
|                                |                                        |                                    |                         |
|                                |                                        |                                    |                         |
|                                |                                        |                                    |                         |
|                                |                                        |                                    |                         |
|                                |                                        |                                    |                         |
|                                |                                        |                                    |                         |
|                                |                                        |                                    |                         |
|                                |                                        |                                    |                         |
|                                |                                        |                                    |                         |
|                                |                                        |                                    |                         |

*Instructions: To complete for ART, refer to pill bottle dispensed to participant at clinic visit.*

### ART Pills

| Date Dispersed<br>(dd/mm/yyyy) | Regimen Dispersed<br>(use codes below) | Total number of pills<br>dispensed | Time of day doses taken |
|--------------------------------|----------------------------------------|------------------------------------|-------------------------|
|                                |                                        |                                    |                         |
|                                |                                        |                                    |                         |
|                                |                                        |                                    |                         |
|                                |                                        |                                    |                         |
|                                |                                        |                                    |                         |
|                                |                                        |                                    |                         |
|                                |                                        |                                    |                         |
|                                |                                        |                                    |                         |
|                                |                                        |                                    |                         |
|                                |                                        |                                    |                         |
|                                |                                        |                                    |                         |

| ART 1 <sup>st</sup> line regimen | Regimen code | ART 2 <sup>nd</sup> line regimen | Regimen code | IPT regimen    | Regimen code |
|----------------------------------|--------------|----------------------------------|--------------|----------------|--------------|
| d4 t- 3TC-NVP                    | 1a           | ABC - ddi - LPV/r                | 2a           | INH            | 0            |
| d4t - 3TC - EFV                  | 1b           | TDF - ddi - LPV/r                | 2b           | INH+B6         | 1            |
| AZT - 3TC - NVP                  | 1c           | TDF - 3TC - LPV/r                | 2c           | Other, specify | 2            |
| AZT - 3TC - EFV                  | 1d           | AZT - 3TC - LP/r                 | 2d           |                |              |
| TDF - 3TC - EFV                  | 1e           | Other, specify                   | 2e           |                |              |
| TDF - 3TC - NVP                  | 1f           |                                  |              |                |              |
| TDF - FTC - EFV                  | 1g           |                                  |              |                |              |
| ABC - 3TC - NVP                  | 1h           |                                  |              |                |              |
| ABC - 3TC - EFV                  | 1i           |                                  |              |                |              |
| ABC - 3TC - AZT                  | 1j           |                                  |              |                |              |
| Other, specify                   | 1k           |                                  |              |                |              |
